# Supplementary material
Source: PubMed Central journal article supplement (PMC8549377)
Supplement: NIHMS1747854-supplement-SI.pdf [file NIHMS1747854-supplement-SI.pdf]

## Supporting Information

### **Modulation of Gold Nanorod Growth via Proteolysis of Dithiol Peptides for Enzymatic Biomarker Detection**

Matthew N. Creyer,<sup>1</sup> Zhicheng Jin,<sup>1</sup> Colman Moore,<sup>1</sup> Wonjun Yim,<sup>2</sup> Jiajing Zhou,<sup>1</sup> and Jesse V. Jokerst<sup>1,2,3\*</sup>

<sup>1</sup>Department of Nanoengineering

<sup>2</sup>Materials Science and Engineering Program

<sup>3</sup>Department of Radiology

University of California—San Diego, 9500 Gilman Dr., La Jolla, CA 92093, United States

\*Correspondence and requests should be addressed to [jjokerst@ucsd.edu](mailto:jjokerst@ucsd.edu)

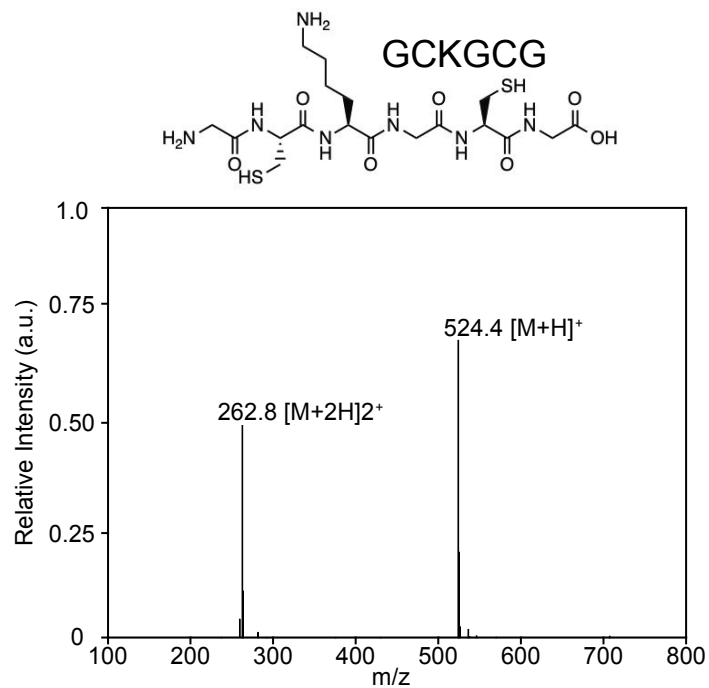

**Figure S1.** Chemical structure and MS-ESI spectrum of GCKGCG.

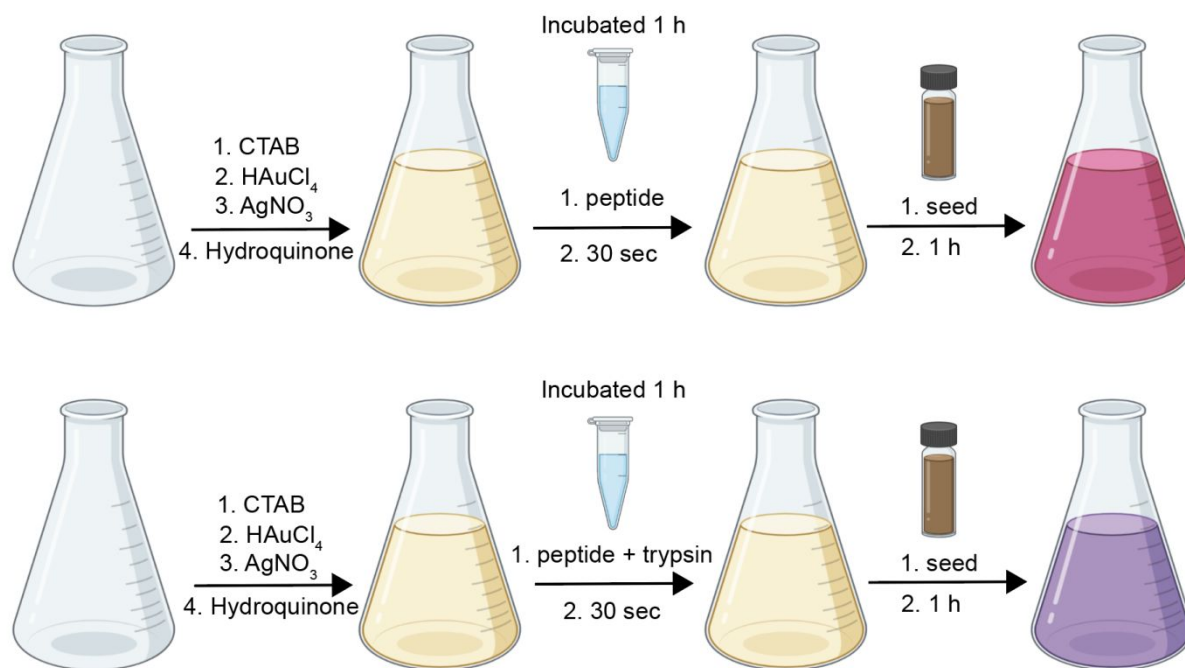

**Scheme S1.** Detection of trypsin using a control synthesis (top, peptide only) and sample synthesis (bottom, peptide and trypsin).

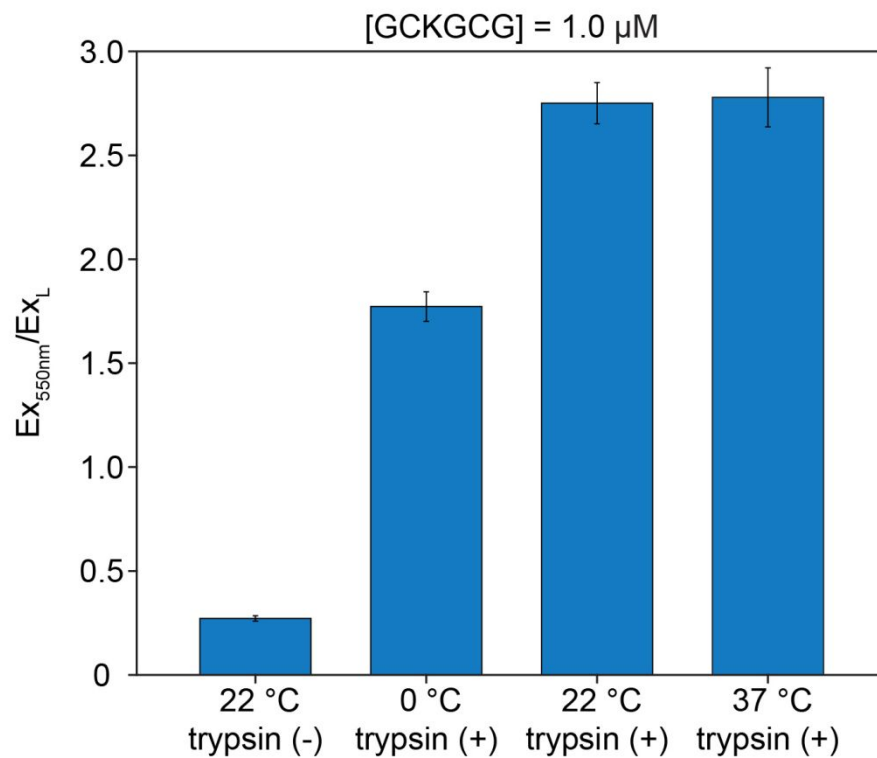

**Figure S2.** Sensing 500 pM of trypsin at different incubation temperatures. Triplicate experiments ( $n = 3$ ) were performed in an ice-bath, at room temperature, and in an incubator.

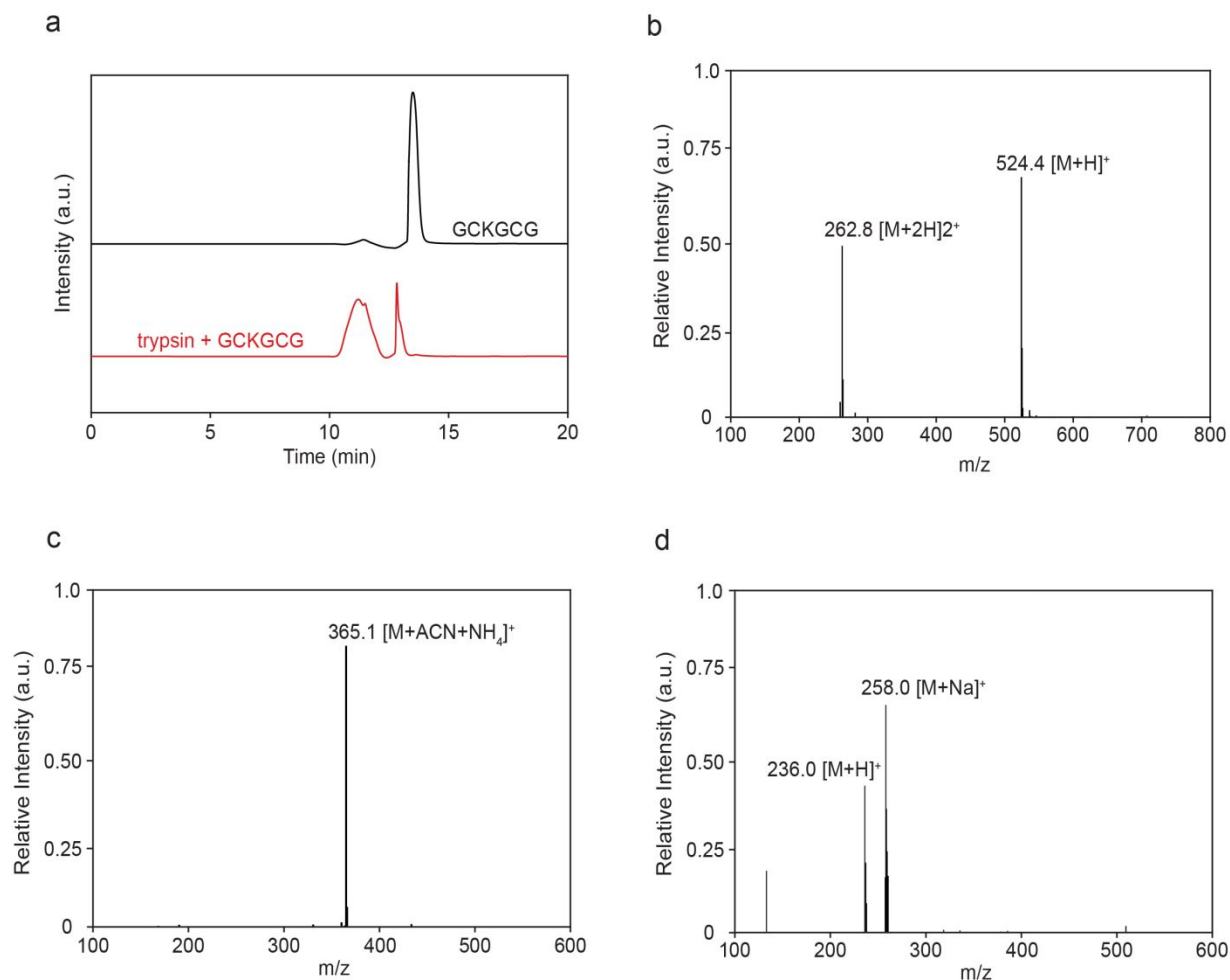

**Figure S3.** Cleavage of GCKGCG after the lysine residue by trypsin. (a) HPLC chromatogram of GCKGCG (0.5 mg/mL) prepared without and with trypsin (0.04 mg/mL) incubation. (b) MS-ESI of GCKGCG. (c,d) MS-ESI of GCKGCG incubated with trypsin (red chromatogram): the peak eluted at ~11 min (GCK) and the peak eluted at ~13 min (GCG).

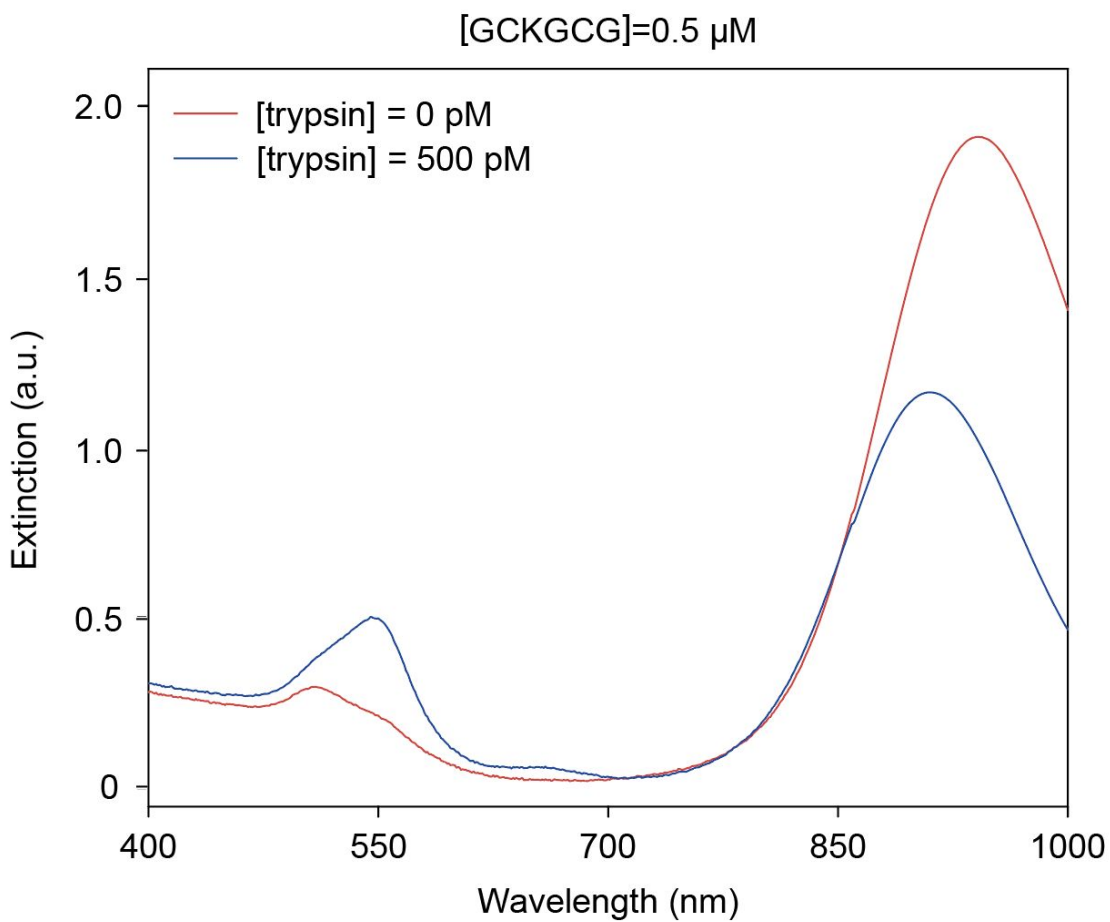

**Figure S4.** UV-Vis spectra showing the LSPR shift of AuNRs synthesized without and with trypsin. [GCKGCG] = 0.5  $\mu$ M for both spectra.

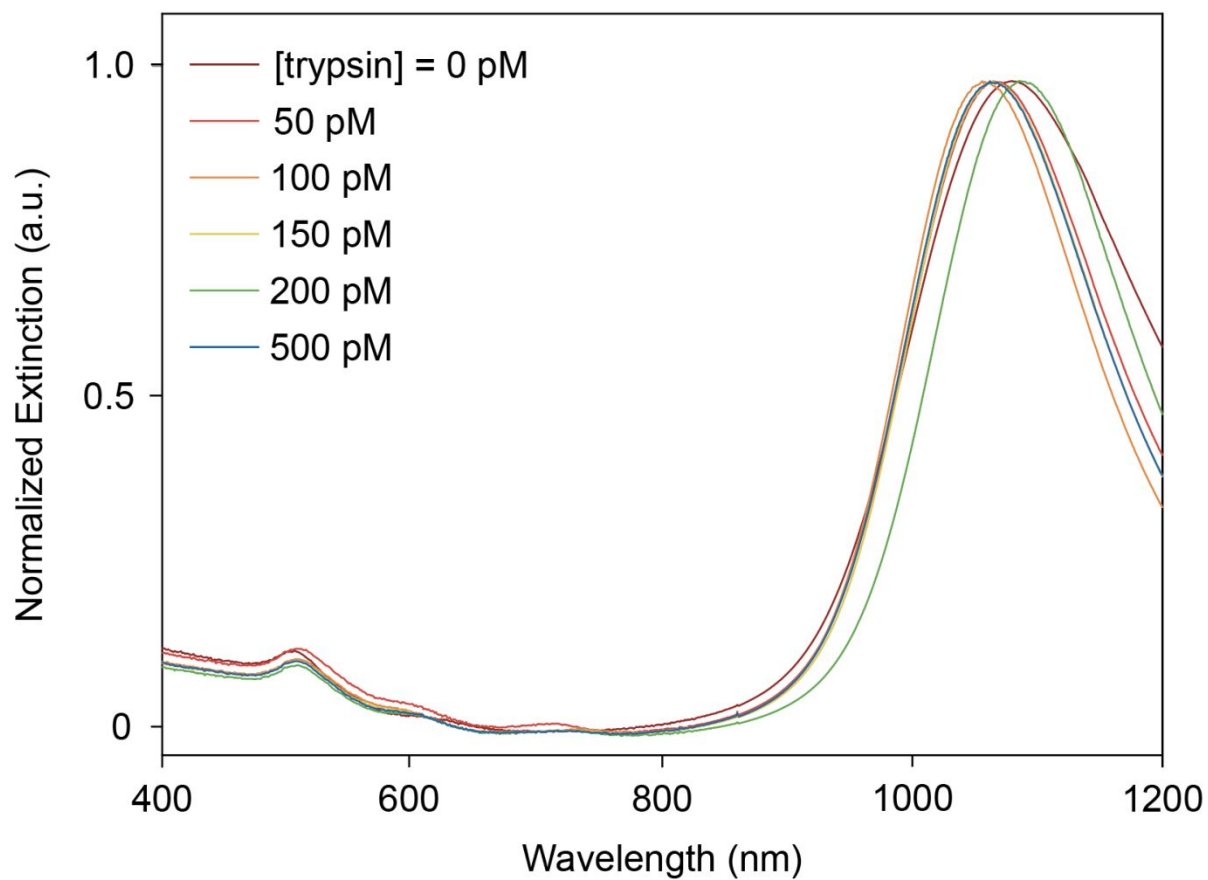

**Figure S5.** UV-Vis spectra showing no correlation between trypsin concentration and the LSPR of synthesized AuNRs.

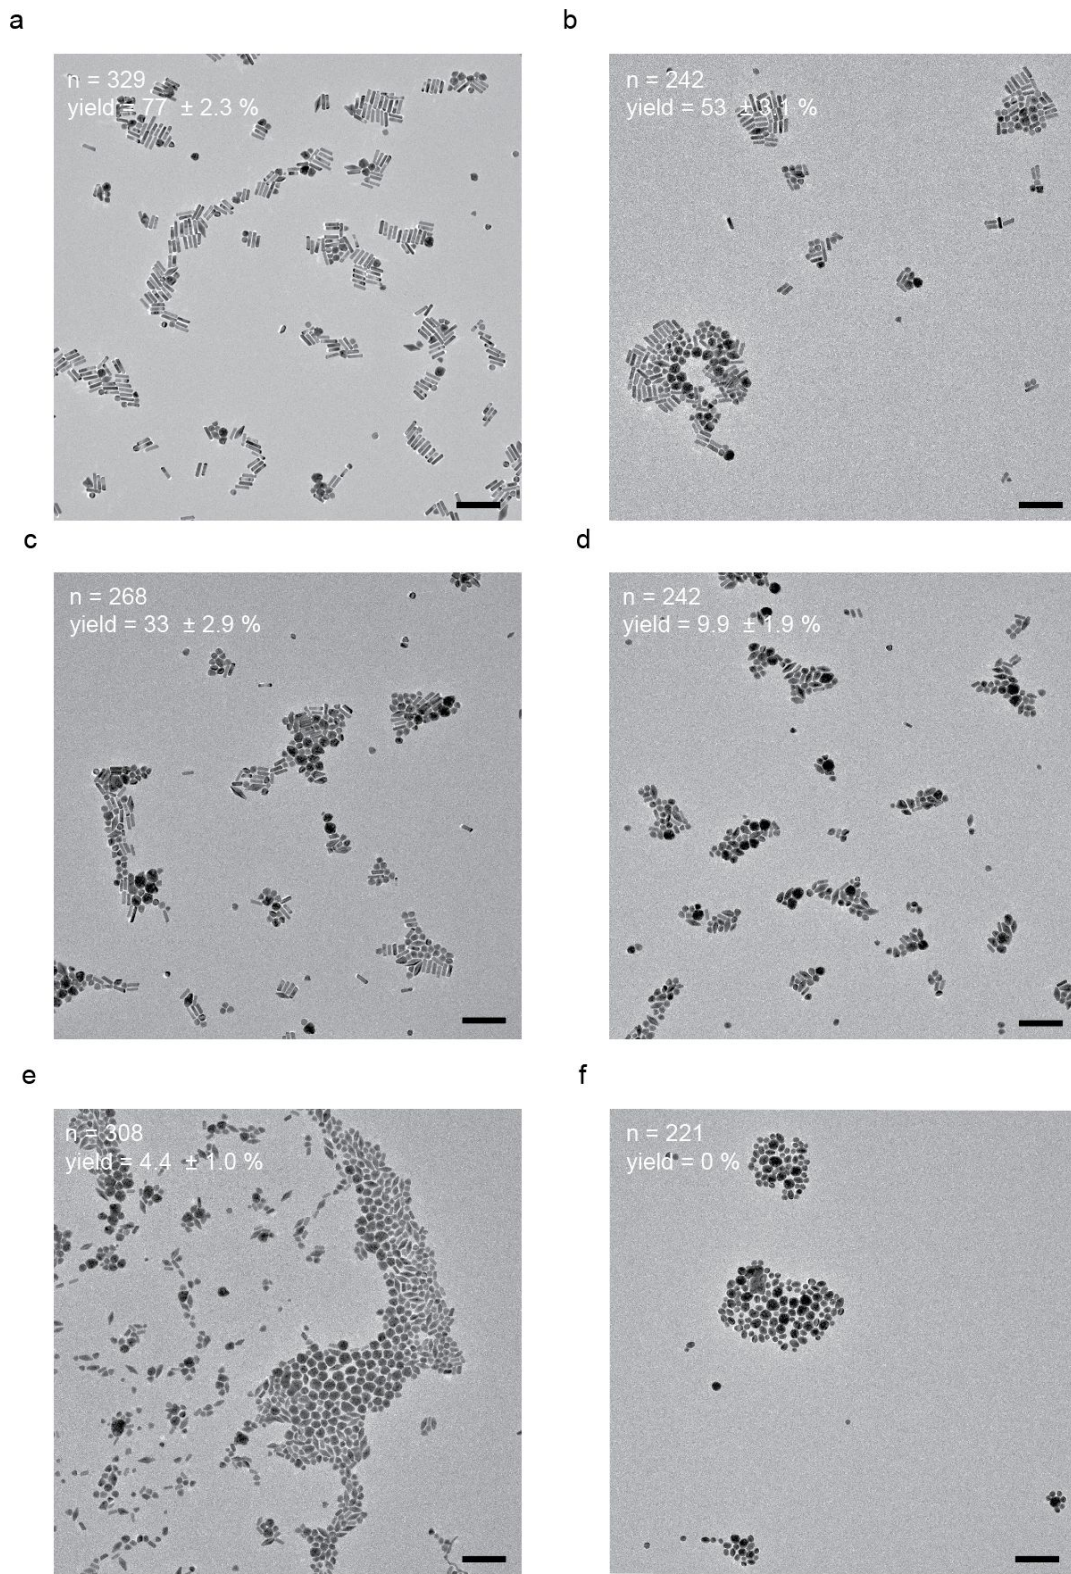

**Figure S6.** AuNRs prepared with GCKGCG (1.0 μM), increasing trypsin, and constant incubation time (1 h) of the peptide protease mixture before injection into the growth solution (a-f) 0, 50, 100, 150, 200, and 500 pM trypsin. Scale bars, 200 nm.



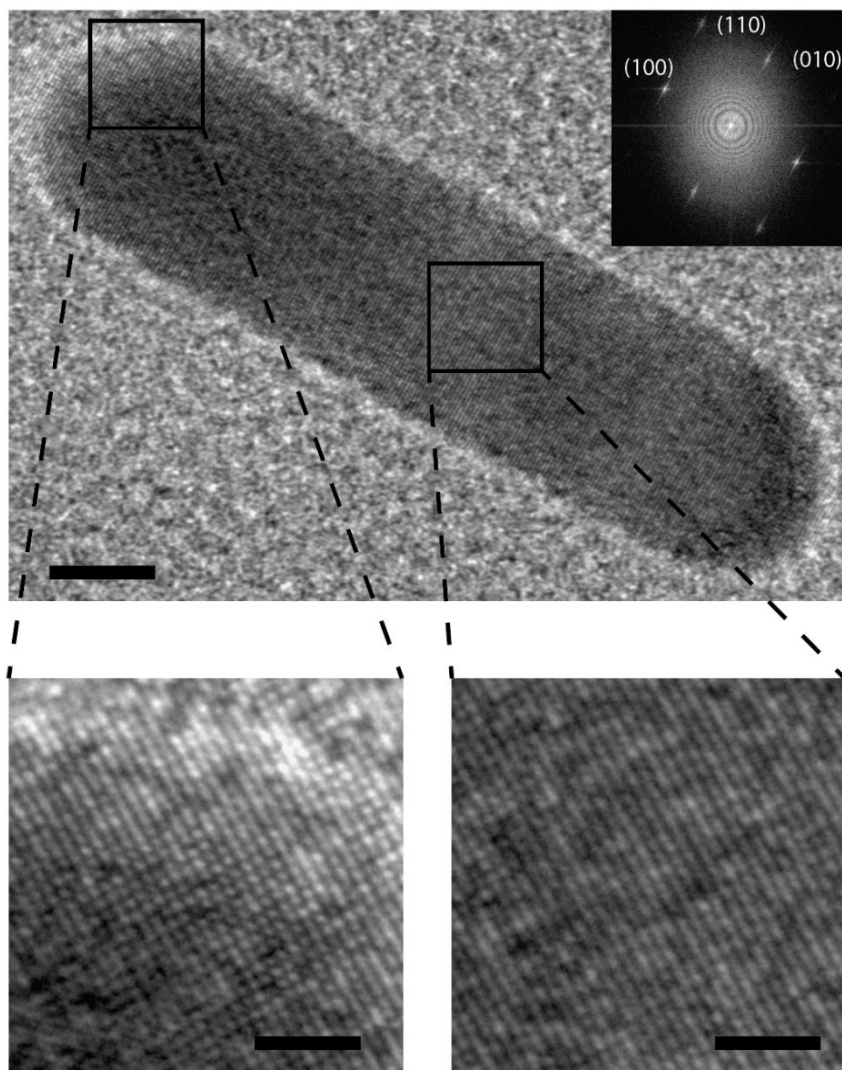

**Figure S7.** HR-TEM image and the FFT pattern showing the single crystalline structure of AuNRs synthesized with GCKGCG (1.0  $\mu\text{M}$ ) and trypsin (0 pM). Scale bars 5 nm, 1 nm (insets).

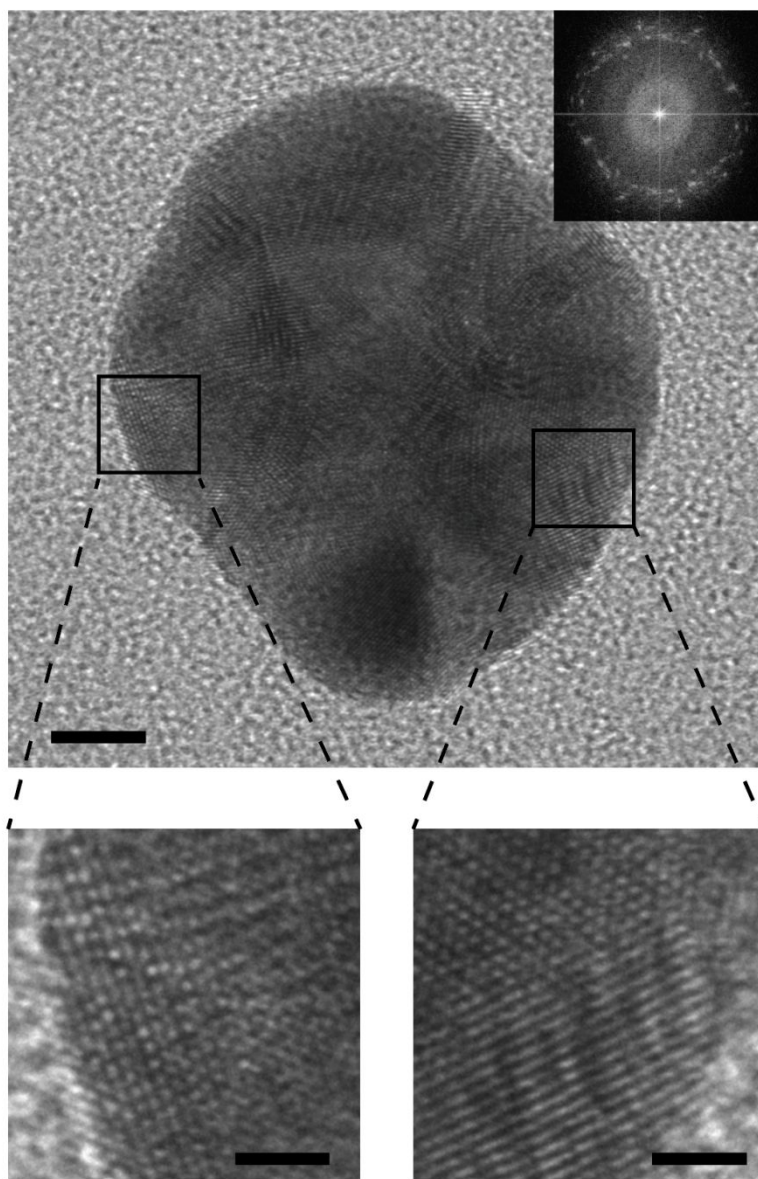

**Figure S8.** HR-TEM image and the FFT pattern showing the polycrystalline structure of the spherical impurities synthesized with GCKGCG (1.0  $\mu\text{M}$ ) and trypsin (500  $\text{pM}$ ). Scale bars 5 nm, 1 nm (insets).

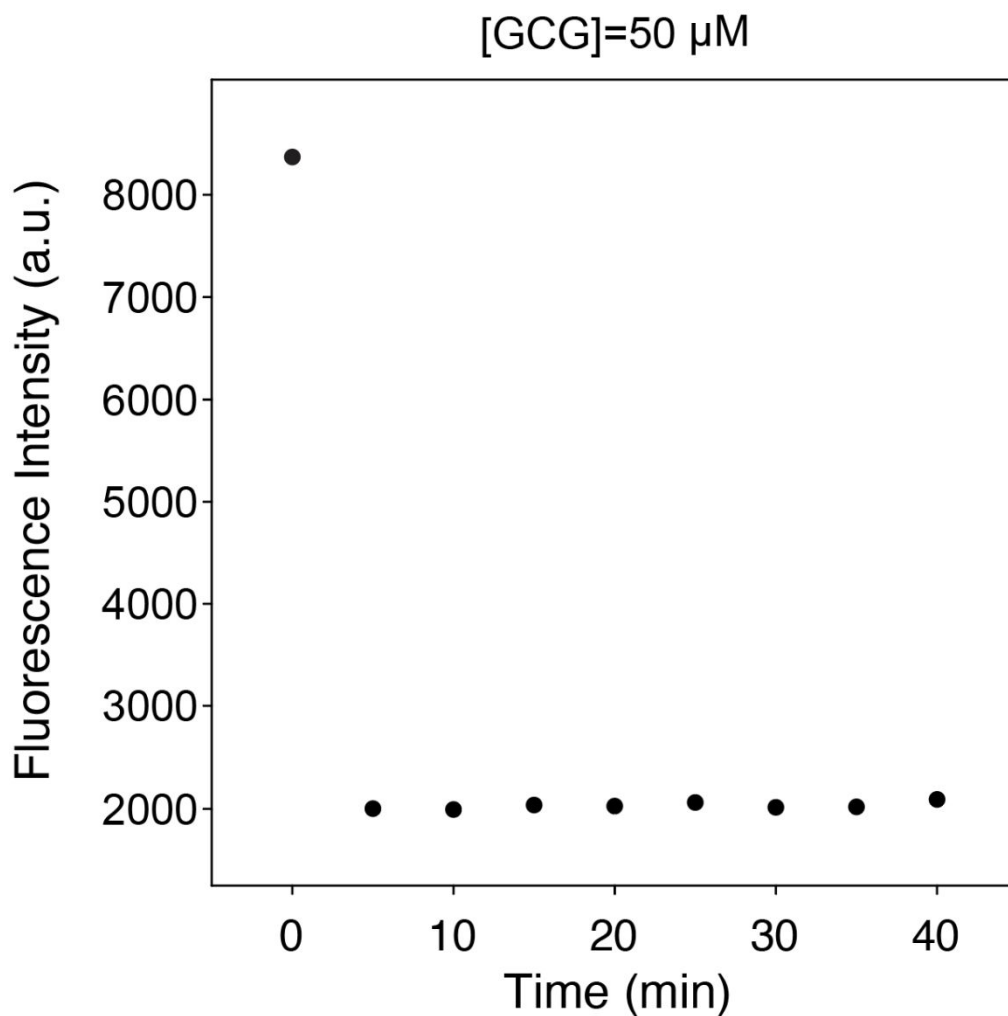

**Figure S9.** Au—S binding kinetics using GCG and gold nanorods. Experiment was performed by adding GCG to a gold nanorod solution, pelleting down the particles using centrifugation, and then measuring the thiol concentration in the supernatant using a thiol-sensitive fluorescent probe.

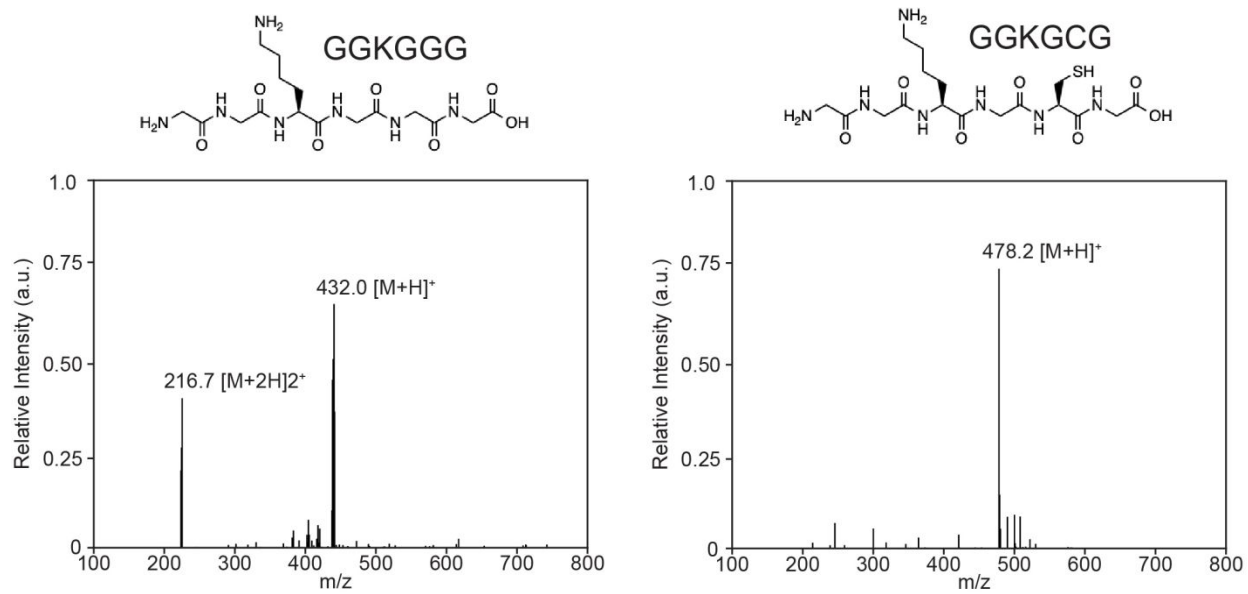

**Figure S10.** Chemical structure and MS-ESI spectra of the purified control probes, GGKGGG and GGKGCG.

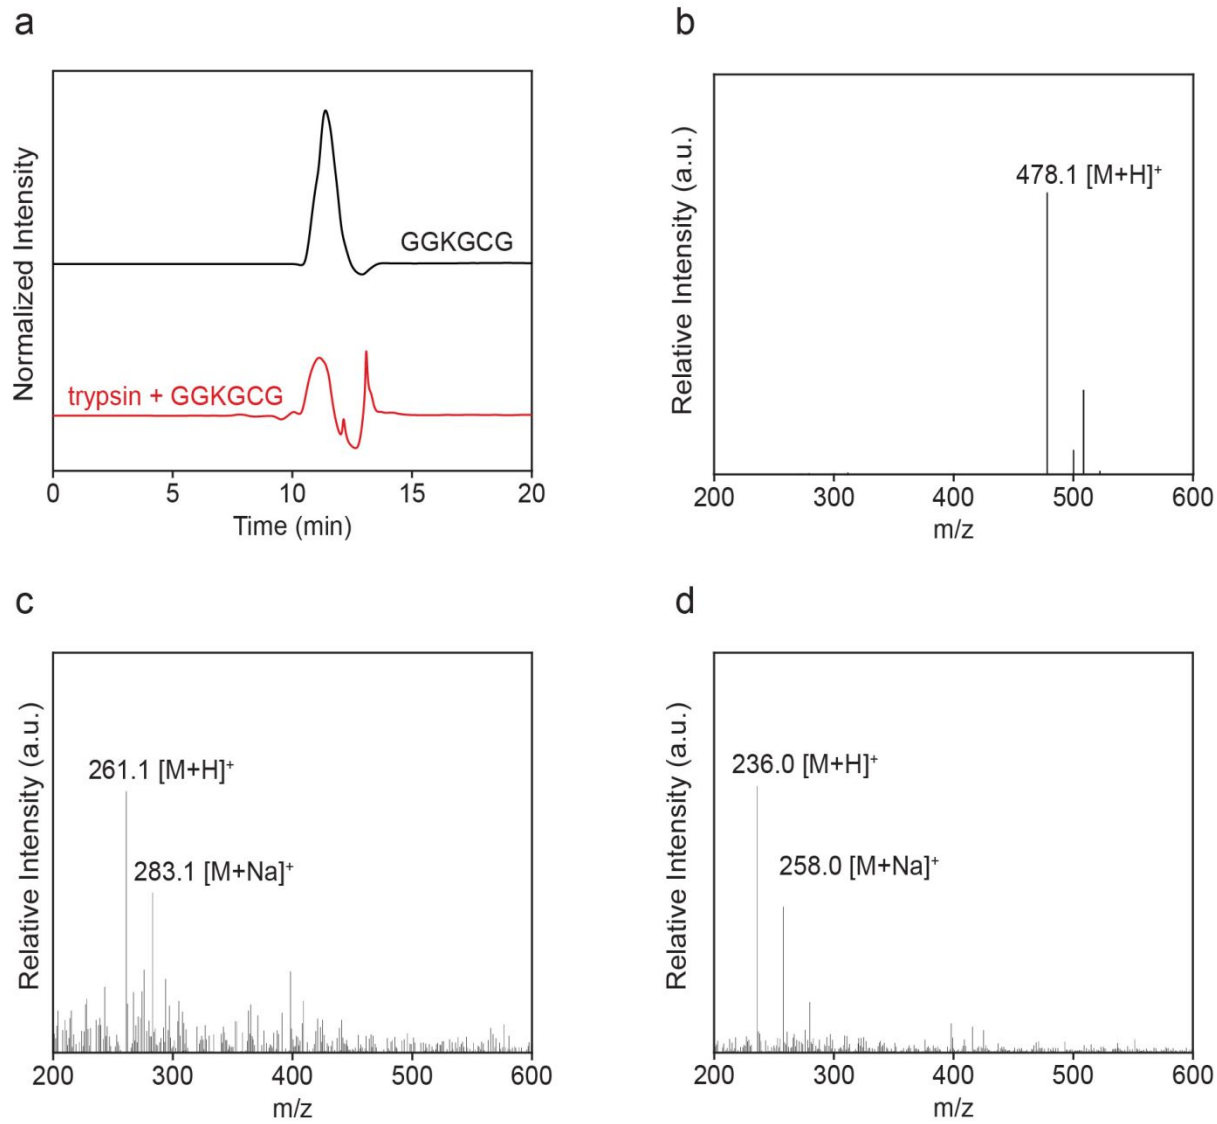

**Figure S11.** Cleavage of GGKGCG after the lysine residue by trypsin. (a) HPLC chromatogram of GGKGCG (0.5 mg/mL) prepared without (black) and with (red) trypsin (0.04 mg/mL) incubation. The black curve was collected using a pump rate of 1 mL/min with a 30 min gradient from 10% to 30% acetonitrile. The red curve was collected using a pump rate of 1 mL/min using constant 16% acetonitrile. (b) MS-ESI of GGKGCG. (c,d) MS-ESI of GGKGCG incubated with trypsin: the peak eluted at ~11 min (GGK) and the peak eluted at ~13 min (GCG).

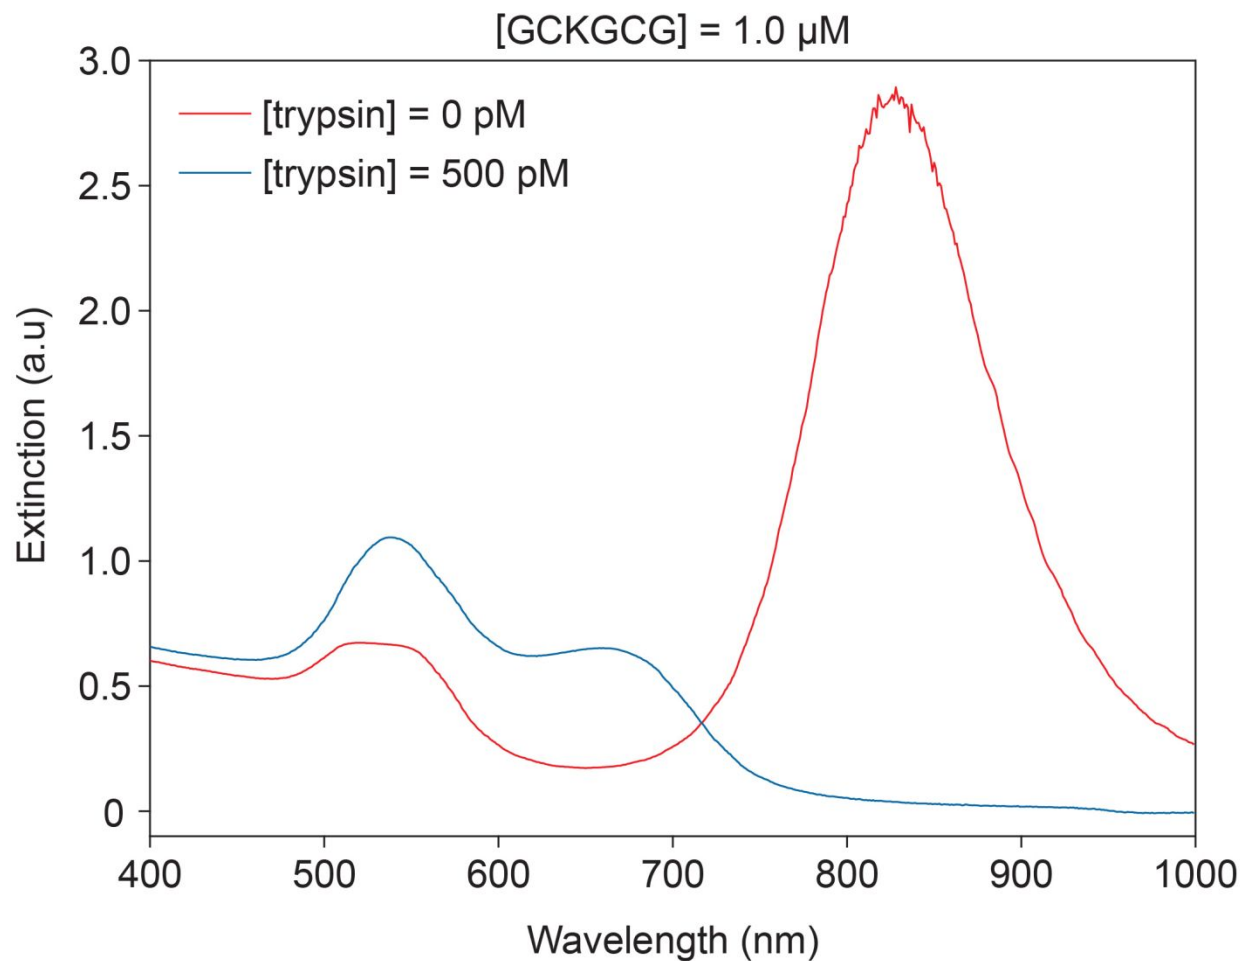

**Figure S12.** UV-Vis spectra of nanoparticles taken 18 hours after seed injection. Samples incubated without trypsin (red curve) and with trypsin (blue curve). Both samples contained 1.0  $\mu$ M of GCKGCG.

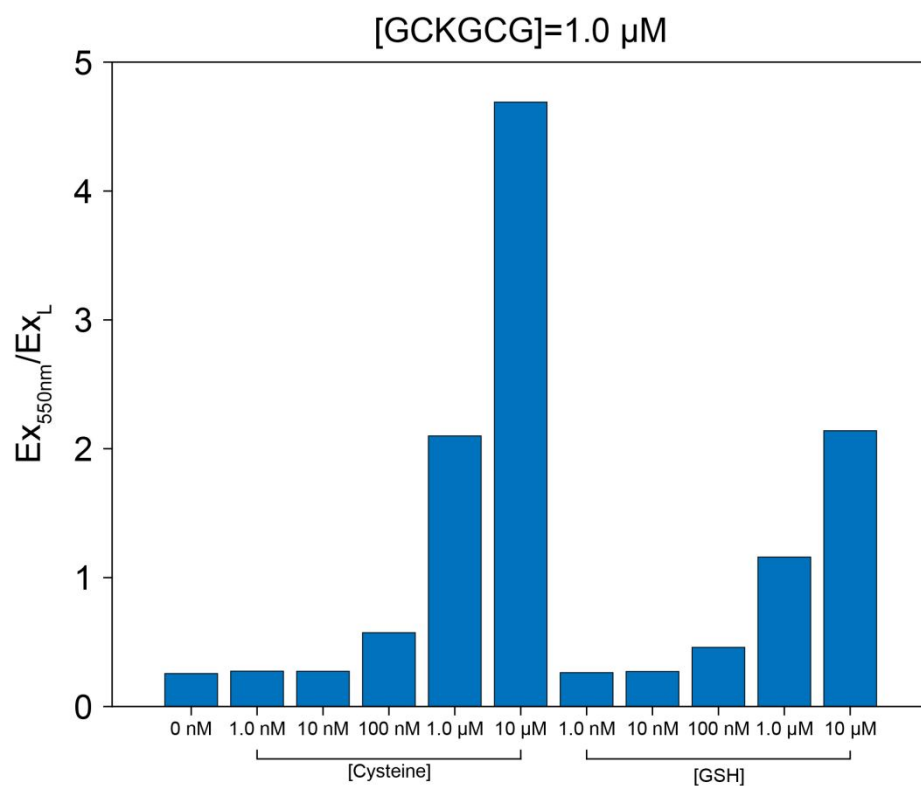

**Figure S13.** Interference experiment where AuNRs were prepared with a constant enzyme substrate concentration ( $[GCKGCG]=1.0 \mu M$ ) and increasing amounts of thiolated biomolecules.

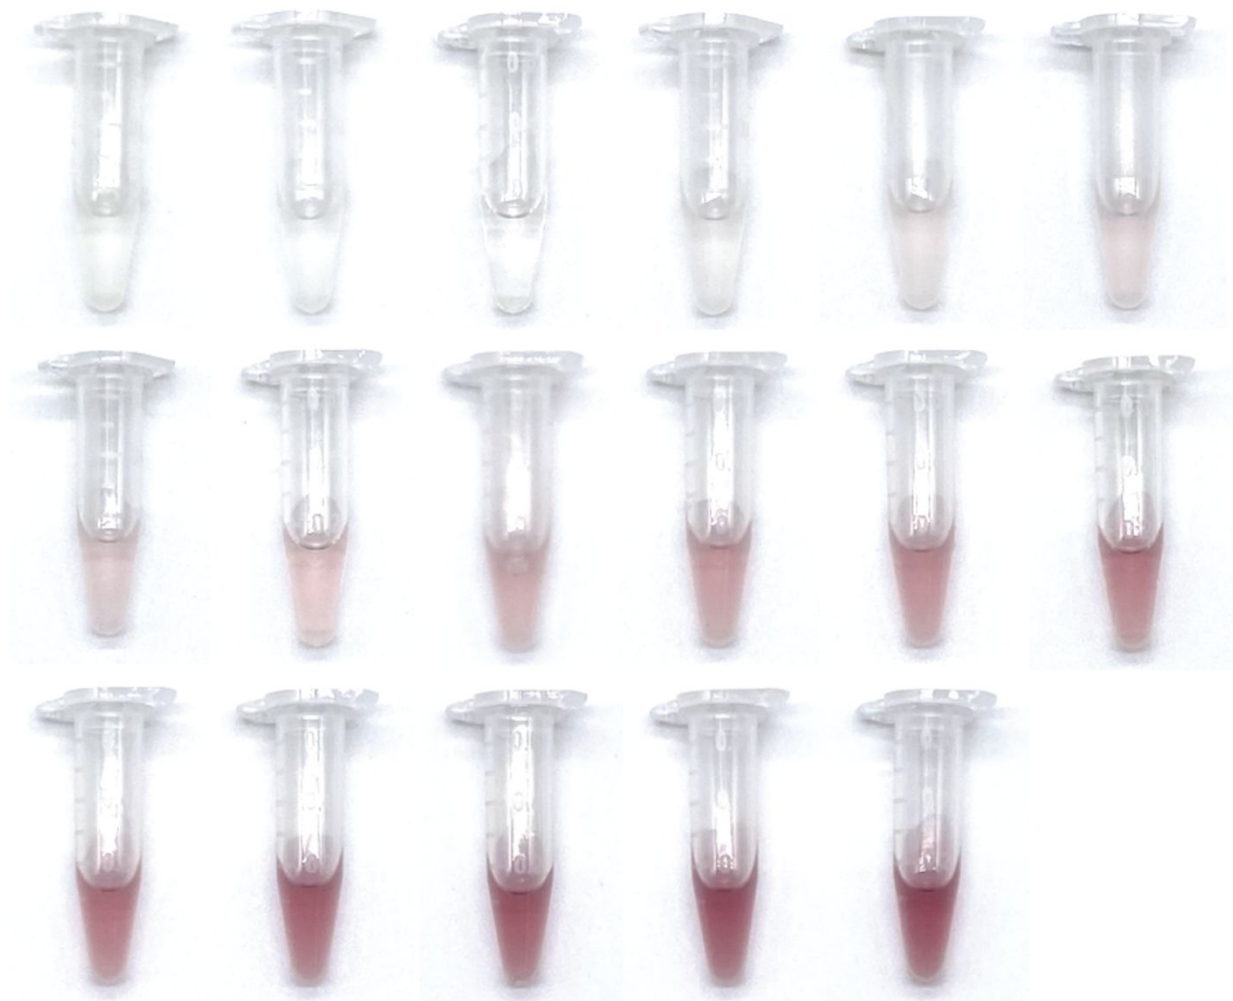

**Figure S14.** Images showing the growth of nanoparticles in GCKGCG (1.0  $\mu\text{M}$ ) with no trypsin incubation prior to seed injection. 200  $\mu\text{L}$  aliquots were removed from the growth solution every 15 minutes after initiation.



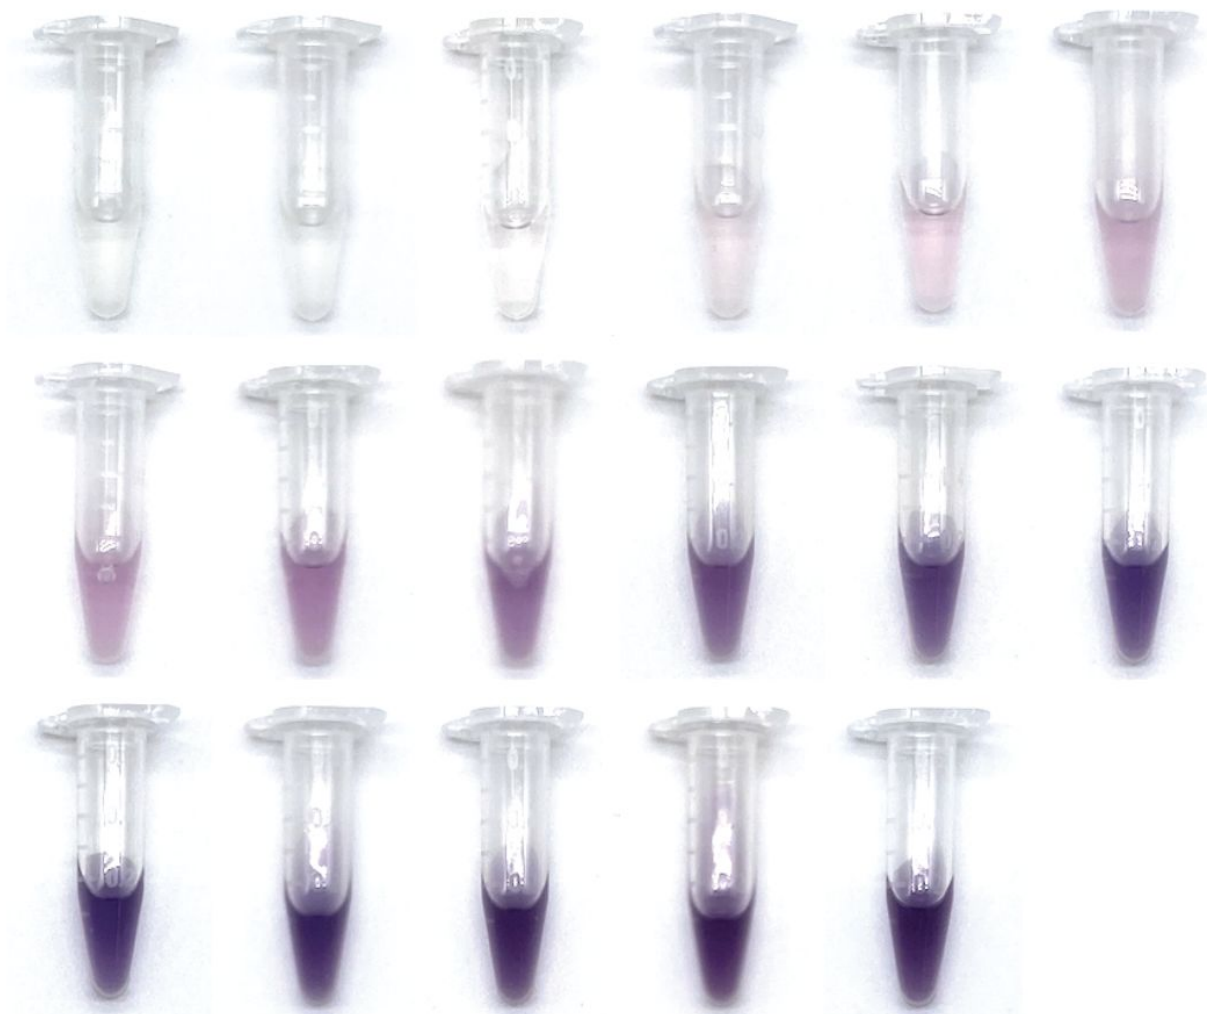

**Figure S15.** Images showing the growth of nanoparticles in GCKGCG (1.0  $\mu\text{M}$ ) and trypsin (500 pM) incubation prior to seed injection. 200  $\mu\text{L}$  aliquots were removed from the growth solution every 15 minutes after initiation.

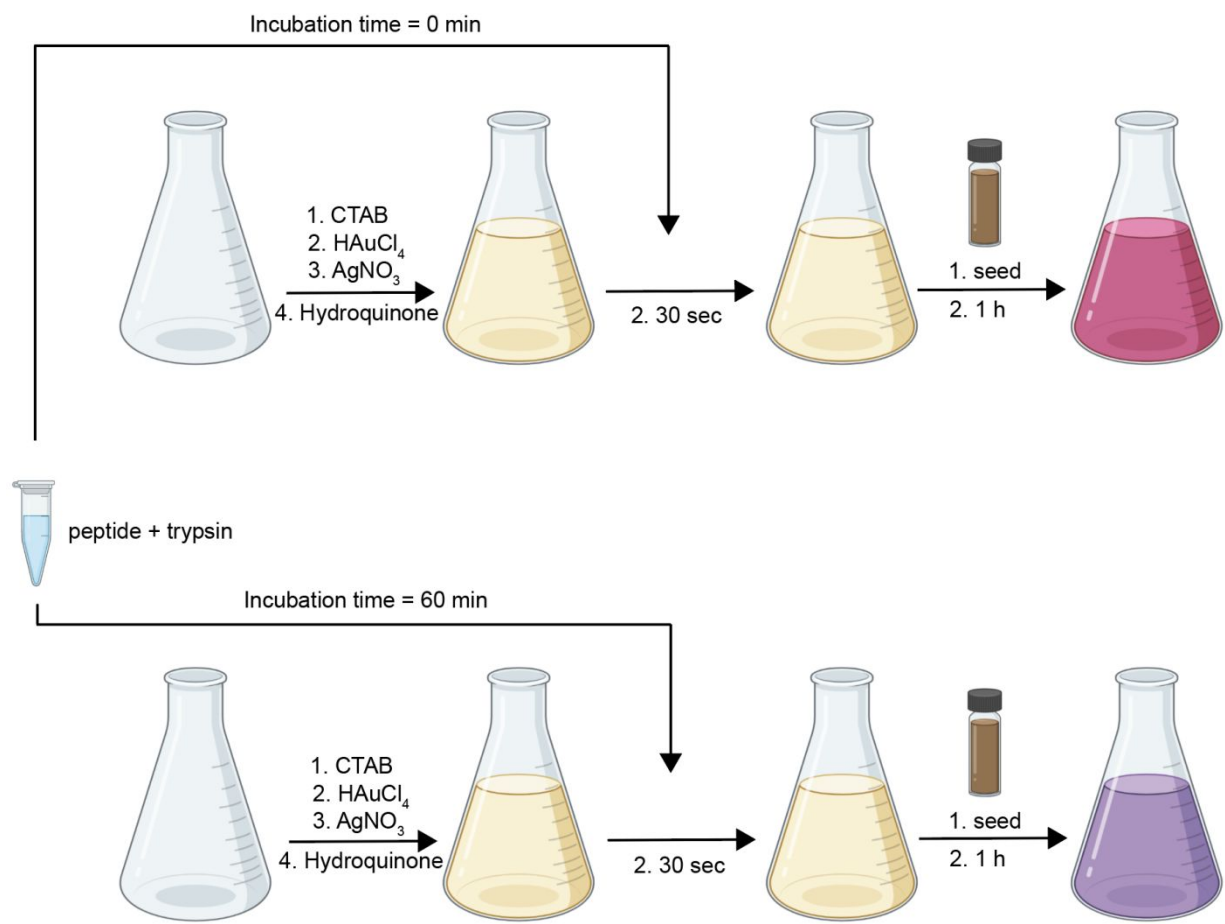

**Scheme S2.** Incubation time dependent detection of trypsin at constant peptide and trypsin concentration.

Increasing incubation time

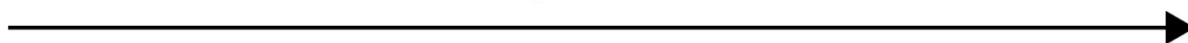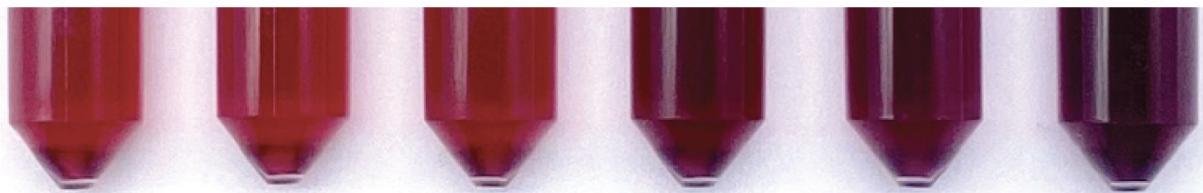

**Figure S16.** Images of nanoparticles prepared with  $[GCKGCG] = 1.0 \mu\text{M}$ ,  $[\text{trypsin}] = 500 \text{ pM}$ , and varying incubation time before injection into the growth solution. Samples represent incubation times from left to right of 0, 5, 10, 20, 40, and 60 min.

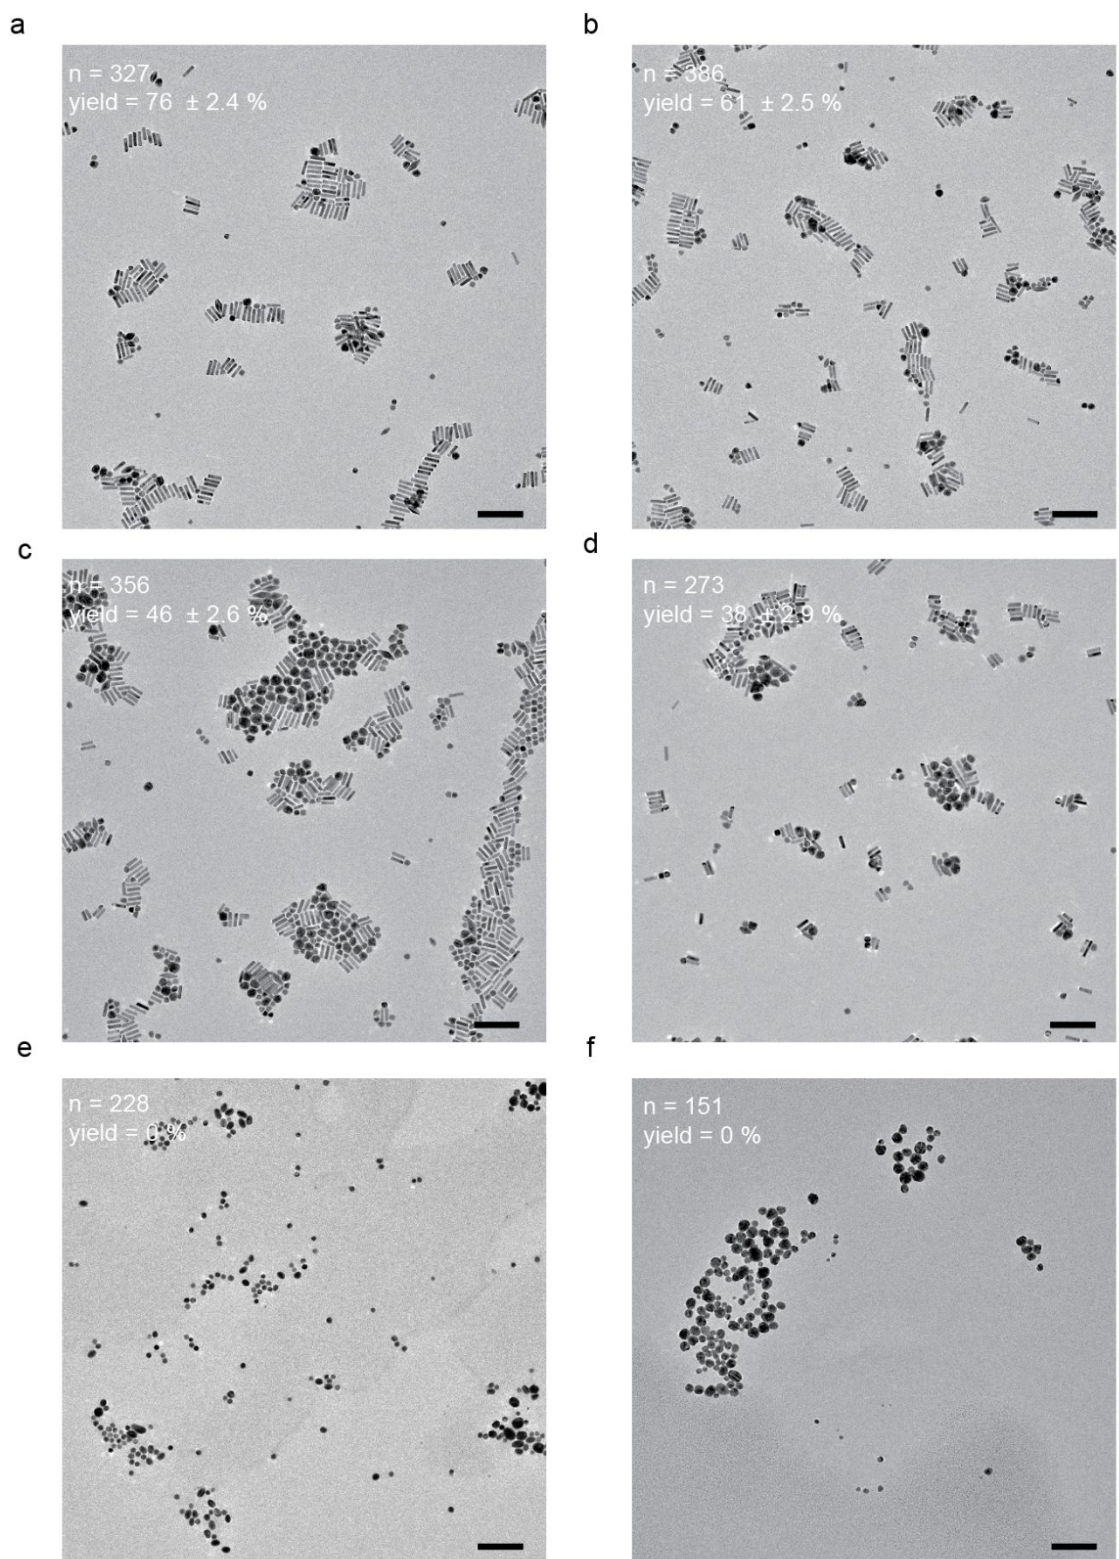

**Figure S17.** AuNRs prepared with GCKGCG (1.0  $\mu\text{M}$ ), constant trypsin (500 pM), and increasing incubation time of the peptide and protease mixture before injection into the growth solution. (a-f) 0, 5, 10, 20, 40, and 60 min. Scale bars, 200 nm.

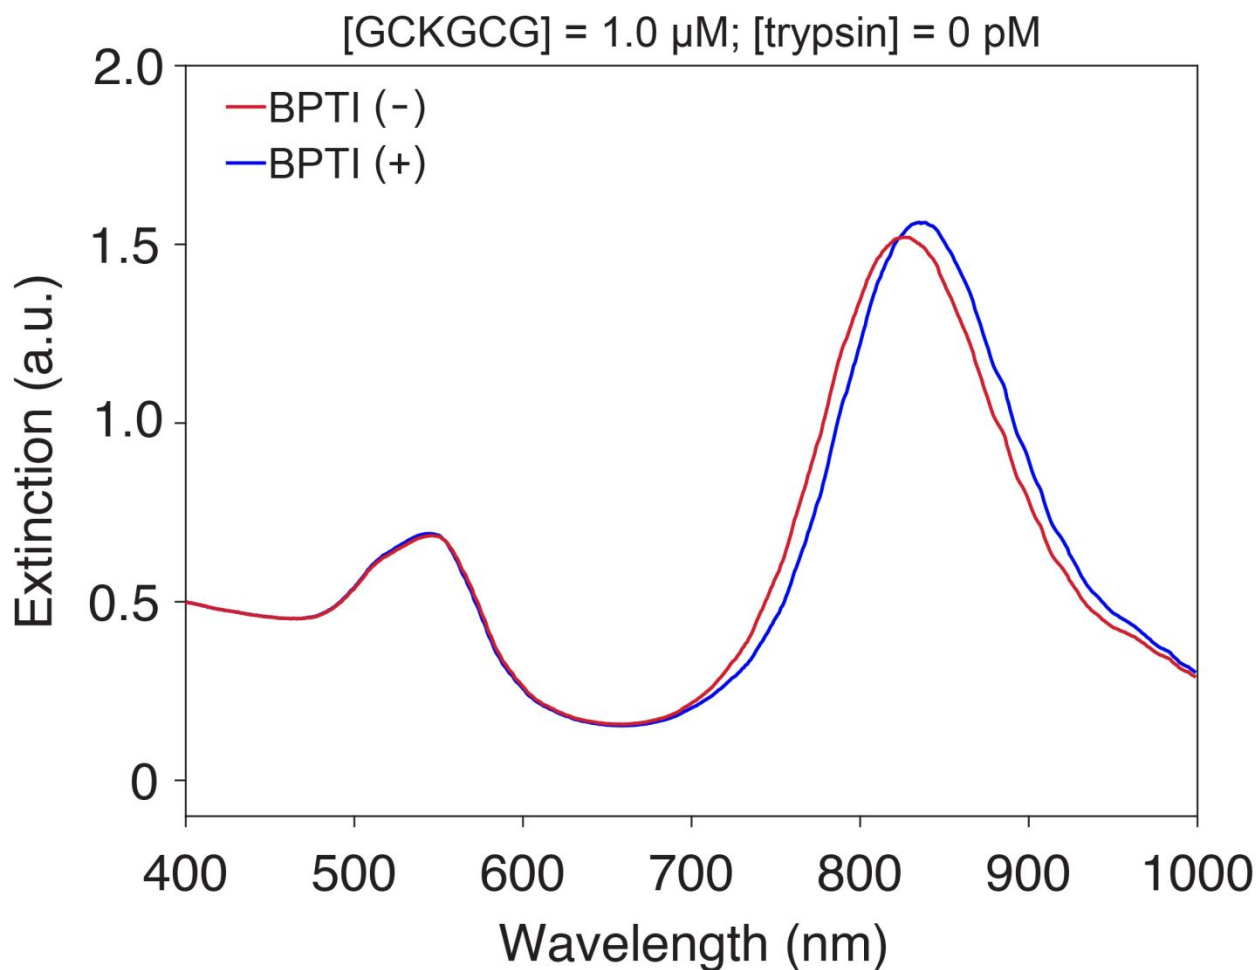

**Figure S18.** Experiment performed in triplicate ( $n = 3$ ). AuNRs prepared with GCKGCG (1.0  $\mu$ M), no trypsin (0 pM), and 0 nM (-) and 5 nM (+) of BPTI. BPTI does not alter AuNR growth in the absence of trypsin.

### **Limit of Detection Calculation**

The limit of detection (LOD) was calculated using the limit of blank (LOB). The LOB is defined as the highest signal generated from a sample that contains no analyte. It is calculated by taking replicates of a blank sample and finding the mean and standard deviation.

$$LOB = mean_{blank} + 1.645(SD_{blank})$$

The LOB encompasses 95% of observed blank values while the remaining 5% contains a response that could have been generated from a low analyte concentration. The LOD is defined as the minimum analyte concentration that can be reliably distinguished from the LOB.

$$LOD = LOB + 1.645(SD_{low\ concentration})$$

The LOD represents an analyte concentration in which 95% of measured samples are distinguishable from the LOB while the remaining 5% erroneously appear to contain no analyte. In our experiments, the LOB and LOD were calculated from Figure 2C using 0 pM and 50 pM of trypsin, respectively.
